# Supplementary material for: Trust, and distrust, of Ebola Treatment Centers: A case-study from Sierra Leone
Source: PLoS One. 2019 Dec 2;14(12):e0224511. doi: 10.1371/journal.pone.0224511 (PMC6886773; doi:10.1371/journal.pone.0224511)
Supplement: S1 File — Statements made by nine groups related to the ETC. (XLSX) [file pone.0224511.s001.xlsx]

## Sheet: Relatives of victims
FOCUS GROUP_RELATIVES OF VICTIMS (persons 4, statements 60)
RUN NO	CARD NO.	AGE RANGE	SEX	Job	Quarantined	QUESTIONS	ANSWERS	BODY RESPONSE
1	Ka1	50-59	F	Farmer	Yes	Think back about the ETC, what feeling does it give you?	I felt so good when I heard the news of the news of the establishment of the ETC. Initially there was no way to get medicine for the Ebola treatment but with the establishment of the ETC we knew things will work well.
2	Kb1	30-39	F	Farmer	Yes		I felt so good because U thought the ETC establishment will relief us from Ebola. We can have benefit from that.
3	Kc1	49-49	M	Farmer	Yes		I was happy when I heard the news of the establishment of the ETC, Initially I was afraid because we were told there was no cure for Ebola.
4	Kd1	30-39	F	Trader	Yes		We appreciated and welcomed the idea of the erection of the ETC for the treatment of Ebola which initially they told us had nu cure.
5	Kc2	40-49	M	Farmer	Yes	What was needed to convince you and your loved one to go to the ETC?	The survivors that were taken to our communities when they get well gave me the courage to take whosoever was sick from my family.
6	Kb2	30-39	F	Farmer	Yes		I had mixed feeling, my daughter was admitted at the ETC which gave me confidence but at the same time I lost my husband at the same ETC. There were lots of survivors from the ETC.
7	Ka2	50-59	F	Farmer	Yes		When by-laws were made that whoever was sick should be taken to the ETC in order to ban Ebola.
8	Kd2	30-39	F	Trader	Yes		It was now clear that Ebola was deadly and the only remedy to cure was take your patient to the ETC. That is why we were willing to undergo the treatment.
9	Ka3	50-59	F	Farmer	Yes	How does the society look at you? That your family member had Ebola and went to the ETC?	I was driven by my husband when my son was affected and was taken to the ETC. I had to find another house to live in. I was marginalized by the society.
10	Kb3	30-39	F	Farmer	Yes		We were very seriously mistreated, people never talked to us, and have nothing to do with me and my family. People didn’t come even close to us. I was stigmatized.
11	Kc3	40-49	M	Farmer	Yes		People saw me as a bad person in the town because two persons of my family died of Ebola, my wife and my son in law. I was stigmatized.
12	Kd3	30-39	F	Trader	Yes		I was stigmatized because I was a carrier of the Ebola virus, especially when I lost my husband.
13	Kc4	40-49	M	Farmer	Yes	What could the ETC have done to avoid this stigmatization?	The workers at the ETC were supposed to visit communities to tell them to accept us and not to stigmatize us. Even though they did so, but yet people did not follow the advice.
14	Kd4	30-39	F	Trader	Yes		No matter what they would have done, the situation would have continued.
15	Ka4	50-59	F	Farmer	Yes		The government must have instituted a law that whoever stigmatizes an Ebola survivor or relative of diseased must be punished by law.
16	Ka5	50-59	F	Farmer	Yes	How was it when your loved one was picked up by ambulance? Can you tell something about that?	When the ambulance came for my daughter to be taken to the ETV, I followed the ambulance on a hired bike which took me to the governmental hospital. But we were then referred to the ETC. I never followed her to that point, I bitterly wept.
17	Kb4	30-39	F	Farmer	Yes		I was seriously disturbed when the ambulance took my husband and daughter to the ETC. I wept I would have loved to follow, but I was quarantined. They waved at me. I felt tears in my heart.
18	Kc5	40-49	M	Farmer	Yes		When my wife was taken away I felt discourages wanted to have a word or two with her, but they denied me the privilege to go. The only thing that I did was to wave at her in the ambulance. My husband said to me, please take care of my children.	Sight
19	Kd5	30-39	F	Trader	Yes		When the ambulance arrived they sprayed chlorine outside the house and inside the ambulance and took my husband away. Every step he took was disinfected. I cried nearly to death.	Horrible.
20	Kc6	40-49	M	Farmer	Yes	What was your idea of the ETC before your loved one got in.	The idea I had about the ETC was that whoever visit or was taken to the center get well.
21	Ka6	50-59	F	Farmer	Yes		It was my idea that whoever was sick and taken to the ETC will be cured.
22	Kb5	30-39	F	Farmer	Yes		I never thought anybody will die at the ETC.
23	Kc7	40-49	M	Farmer	Yes	What is your experience from the time they were in?	I was bitter experience because my loved ones taken to the ETC never came back.
24	Kd6	30-39	F	Trader	Yes		Initially when my husband was taken to the ETC, I was convinced that he will come, but when I was told he died I felt so bad. So I had mixed feelings.
25	Kb6	30-39	F	Farmer	Yes		My experience I had was so bad because I never thought anyone taken to that center will die. I was taken back. I felt discouraged and defected due to the bad news.
26	Ka7	50-59	F	Farmer	Yes		My experience was bitter because the unexpected happened.
27	Kb7	30-39	F	Farmer	Yes	Did you visit the patient in the ETC? Why, why not?	I did not visit him since I was quarantined.
28	Kd7	30-39	F	Trader	Yes		It was a restricted area to go if you were not sick or a visitor.
29	Ka8	50-59	F	Farmer	Yes		I never paid a visit because I was not allowed to people told me.
30	Kd8	30-39	F	Trader	Yes	How was it to see your loved one?	I felt so bad because I wanted to pay visit to my husband but was not allowed. I was eager to go see him bur to us avail.
31	Ka8	50-59	F	Farmer	Yes		I nearly cried my eye out when I did not see my daughter.
32	Kb8	30-39	F	Farmer	Yes		I was dearly in need to see my husband but was not permitted to do so.
33	Ka9	50-59	F	Farmer	Yes	What impression did the ETC give you?	There was no visitation allowed therefore made no impression on us who had patients out there at the ETC. I had negative impression about the restriction from visiting my daughter.
34	Ka10	50-59	F	Farmer	Yes	How was the contact with the workers.	I had a kinsman from the same village (Tiama) who worked at the ETC, gave me information about what was happening at the ETC. I gave him my phone number which he used to call me and report the death of my daughter.
35	Kc8	40-49	M	Farmer	Yes		I had one worker who’s phone number I had. It was him that used to give me whatever information I needed.
36	Kb9	30-39	F	Farmer	Yes		My husband had a brother who was a worker at the ETC, whatever information from the ETC, I got from him.
37	Kd9	30-39	F	Trader	Yes		I had no relation with the ETC workers and therefore no information from anybody at the center.
38	Kd10	30-39	F	Trader	Yes	How do you feel you could not care yourself?	I was really dissatisfied when my husband was taken away from me and was not given the privilege or chance to take care for him myself. I would have liked to do it myself.
39	Ka11	50-59	F	Farmer	Yes		I was really disappioned and defecred. There was no way I could take care of my daughter when she needed me most. Because I was not close to launder or cook for her. I could not give her anything.
40	Kc10	40-49	M	Farmer	Yes		The workers in the ETC took care, but will never do it well and in the same way as I would have done that.
41	Kc9	40-49	M	Farmer	Yes	How do you look at the people that worked there?	I do respect them as heroes.
42	Ka12	50-59	F	Farmer	Yes		They are helpful because they were our medium of communication
43	Kd11	30-39	F	Trader	Yes		I admire them as I speak because they did everything they could do to savage the situation
44	Kb10	30-39	F	Farmer	Yes		I am always happy when I see them, even though my husband died, but my daughter survived. I have mixed feelings.
45	Ka13	50-59	F	Farmer	Yes	How did you hear your husband passed away? Can you explain?	A worker at the ETC (a cook) told me that my daughter was dead. When she saw my daughter at the ETC she recognized her so when she died, she informed me.
46	Kb11	30-39	F	Farmer	Yes		A worker from the ETC called one of the security personnel gating my quarantine hence to tell us my husband was dead.
47	Kc9	40-49	M	Farmer	Yes		A member of the taskforce in the village told me that my wife was dead, when I was asked how he told me, this happened a week ago.
48	Kd12	30-39	F	Trader	Yes		A worker of the center who knows my husband told me about his death.
49	Ka14	50-59	F	Farmer	Yes	Did you have the chance to see the crops	No, I did not see the crops. Not seen a picture of the crops neither the grave. I did not know that there was a grave until today.
50	Kd13	30-39	F	Trader	Yes	Did you go to the burial?	We never set eyes on the corps not even visit the burial or loved ones. We did not know there was such a ceremony.
51	Ka15	50-59	F	Farmer	Yes	How is it for you that your loved one is buried at the ETC?	I felt bad because we never saw where they were buried and was only told. Who knows how they were buried in mass grave and denied our traditional demands decent burial practice. In that we burry our own deaths.
52	Kb12	30-39	F	Farmer	Yes		I felt as costoms and tradition demands I should be at the grave side while my husband is buried. I wish to be there and take an active role in that.
53	Kc10	40-39	M	Farmer	Yes		The way the burial was done at that time was not decent and cultured. It was very barbaric. You should be buried with respect and prayers.
54	Kd14	30-39	F	Trader	Yes		The burial practice was not followed, so I felt bad.
55	Kd15	30-39	F	Trader	Yes	How do you feel about the way the funeral is practiced? Could they do it better?	They never practiced decent burial. Body was not washed or even prayed on so it would have been better if they handed over the crops to us for burial.
56	Kc11	40-49	M	Farmer	Yes		We were happy because at the ETC they take time to take care of the burial, the only diserepaurey was we were not allowed to witness the burial.
57	Kd16	30-39	F	Trader	Yes	What needs are there in order to have a good health practice?	We knew nothing about what health practice was carried out at the ETC.
58	Kc12	40-39	M	Farmer	Yes		They should have introduced a visiting hour for family members to pay visit to their loved ones.
59	Ka16	50-59	F	Farmer	Yes		They should have allow family members to attend the burial of their loved ones.
60	Kd17	30-39	F	Trader	Yes	What should not be there?	The location of the cemetery close to the ETC was very unrealistic. That was on agent of fear into the minds of the patients. It send bad signals to both patients and family members.

## Sheet: Nurses
FOCUS GROUP_NURSES (persons 7, statements 29)
RUN NO	CARD NO.	AGE RANGE	SEX	Job at ETC	QUESTIONS	ANSWERS	BODY RESPONSE
1	Da1	20-29	F	Nurse	If you had work before, why did you change your job for the ETC?	Before the intervention we were working as volunteers, this was not a permanent job. We worked without salary. We had the opportunity to work at the ETC to earn money and to safe our people.
2	Db1	20-29	F	Nurse		As my sister just said we went to work in order for us to get a job and instate a payment. The ETC brought lots of materials and the expats brought knowledge. To work in the ETC was more save and secured. In the end they even promised us to give us benefit but nothing has not done and we are only saving our people. Also the government promised us jobs and other benefits, but we have nothing recei…
3	Dc1	30-39	F	Nurse		Because the case is a health issues and as volunteers we were almost complete to work so as a result they will employ us but nothing was happened.
4	De1	30-40	F	Nurse		To fight for the country.
5	Dd1	30-41	F	Nurse	Is nursing in an ETC different than in other health facilities?	In the ETC there was a different dressing code called PPE. That was not only in the ward worn.
6	De2	30-39	F	Nurse		At the ETC our lives were at risk because we were worried about our lives. There was a possibility present to get infected with the disease we were curing in the ETC.
7	Da2	20-29	F	Nurse		In the hospital you can dress in the way you like. In other places there was much more care given by relatives. ETC we did it what was less dignity. The ETC had a high-risk zone and the hospital is a low-risk zone. While working in the hospital, our relatives were very happy but when working at the ETC we were even driven from our houses. We were under pressure as they were observing all of us li…
8	Df1	20-29	F	Nurse		Great care were taken at the ETC not to do any little mistake as when you are threatening patients and he or she vomits you are in a serious worry not to be affected with Ebola as in the ward it is different.
9	Dg1	30-39	F	Nurse	Do you think the expatriates had enough knowledge to manage the Ebola? How was that at the beginning?	The expatriates had knowledge already from the beginning of their intervention. From that they made up procedures that were well followed. As in other health facilities many health workers were dying but with the operation of the ETC the death rate was reducing.
10	Dc2	30-39	F	Nurse		During the intervention of the expatriates even the dressing codes were observed. Even the time was continuously observed. They trained us how to be careful for each other and ourselves.
11	Da2	20-29	F	Nurse	Do you think you could run the ETC without the Expatriates? Without them, how would it have been looked like?	Without expatriates the disease would have overcome us. We don’t have the right knowledge everybody would have been infected. The ETC would not have been different than the Governmental Hospital.	No serious about answering this question.
12	De2	30-39	F	Nurse	How was it every time to work with different expats?	When working with the expatriates these were a lot of encouragement not to feel frustrated during the work. They came every time with new energy. I have made a lot of new friends. Further their brought new ideas about how to face the problems.
13	Db3	20-29	F	Nurse		During their intervention we had a lot of interaction and had a lot of trainings with certificates which is even helping us. We were given memory sticks and even promised us computer and laptops. An dinner was the end present.
14	Dg2	30-39	F	Nurse	How was the balance in managing the ETC between locals and expats? Was there enough collaboration and was your voice considered?	They worked fine without problems in good collaboration. Only the promise they gave us did not fulfill.
15	Db4	20-29	F	Nurse		The management was in good collaboration. Though the lead was more from the expatriates than the local colleagues.
16	Da3	20-29	F	Nurse	How was it when J. (head nurse) was in Kono?	We didn’t feel fine when J. was in Kono. Though, other nurses took her place. But the job as J. fulfilled it nobody could do that. She was a hero.
17	Db5	20-29	F	Nurse		The absence was very much felt. She was a woman and a nurse with passionate care. She always encouraged the workers. We dearly missed her. The replacement did not feel the same.
18	Dg3	30-39	F	Nurse	Were still all procedures well followed as she was present?	Yes, we still followed the procedures. The replacer that was flown in added even more	sad
19	Da4	20-29	F	Nurse		This replacer was only adding more procedures.
20	Dd2	30-39	F	Nurse	How did you receive the news of the infection of M.?	Everybody was worried end even all those who were in the shift with him was quarantined. So we were discouraged
21	Dc3	30-39	F	Nurse		We were very much worried as even myself, I was working with him and I took even up his position when he was passed away. We were intimate friends that is why I was quarantined for a longer time.
22	Db6	20-29	F	Nurse		At the time of the dead of M. everybody was very much worried and afraid as that was the time that we had a massive admission from Kono. So this happened due to the patients of Kono. We blamed the patients. From that moment we did not want to admit new patients from Kono.
23	Dd3	30-39	F	Nurse	How did it feel that is was him?	It discouraged us. He was really our icon. He could handle all jobs and he was seen as a hero. So if even M. could get infected who would have been the next one?
24	Da5	20-29	F	Nurse	Did you feel attacked by your own safety?	We never felt happy because he was a hero and a hard worker as we were working together.
25	Df2	20-29	F	Nurse		We felt very much worried as he was our colleague working together. We felt attacked, we did the same job and had much in common.
26	Db7	20-29	F	Nurse	What gave you confidence to continue working at the ETC?	To safe the life of our people as our families and our colleague nurses were doing. And since we were certificated we were working as volunteers, but we worked at the ETC to get pin code. We took up the ought that every nurse takes. We are the only hope so many other nurses already died.
27	Df3	20-29	F	Nurse		We accepted to work at the ETC in order to get chance to get pin code and to get good job after the Ebola. The president promised us a payment after the outbreak.
28	Dg4	30-39	F	Nurse	Was everything the same again?	The conditions were getting worst as we learned to acquire the job but they have even left us even the volunteering.
29	Db8	20-29	F	Nurse		We even want to continue the education but we cannot since there is no job opportunity in the country as we want to further our education but no finance are present to support our education. We are surviving through the help of the people around us.

## Sheet: Drivers
FOCUS GROUP_SURVIVORS (persons 2, statements 36)
RUN NO	CARD NO.	AGE RANGE	SEX	Date of admission	Date of discharge	QUESTIONS	ANSWERS	BODY RESPONSE
1	Ga1	30-39	M	2015-01-27	2015-02-14	What image did you have of the ETC before you went in?	I was with the intention that been there I will not survive. People told me this and I saw witnesses. People were always dying when I was taken there.
2	Gb1	30-39	M	2014-10-07	2014-10-18		I was confident about surviving if I was carried there. Reason is that I saw experts and believe that where ever they are there is the truth. Also I was having another confused mind about what people were saying; that there was no medicine to cure Ebola.
3	Gb2	30-39	M	2014-10-07	2014-10-18	Did this image correspondent with the reality? What were the differences?	At the time I was taken to the ETC, all my perceptions were turn around. Meaning, I was received well and well cared for immediately. That is taking to my own yard in a separate bed. I was interviewed and immediately given drugs. This encourages me very greatly. As what heard is not what is seen.
4	Ga2	30-39	M	2015-01-27	2015-02-14		The way I was received by the workers especially the expatriates proofed I will survive from the virus. Every hour people were checking on me. Also it proves to me that all what people said about Ebola was false (that if you are taken to ETC, you will not survive- all was false).
5	Ga3	30-39	M	2015-01-27	2015-02-14	If you think back about your stay, what feeling does it give you?	I felt relieved because I am save especially the time I started talking to my family. I feel encouraged and thankful to God.	Happy
6	Gb3	30-39	M	2014-10-07	2014-10-18		Even when I am undergoing this interview I am very happy. This is to say that the ETC center was the best. No to be compared to the governmental hospital in Kenema where some people were hospitalized.	Happy
7	Gb4	30-39	M	2014-10-07	2014-10-18	What discouraged you? What experiences would you like to forget?	When I remember a friend of me who was a victim next to me screaming and screaming until death. In the morning I did not see him again. That was a very sorrowful incident. I could not want to remember again.	Sad
8	Ga4	30-39	M	2015-01-27	2015-02-14		Also was sharing a room with a co-patient who fall by the toilet door and made a very loud shout that scared me. It fermented me for the whole day, could not want to remember such again in my life. We were admitted together.	Sad
9	Gb5	30-39	M	2014-10-07	2014-10-18	What encouraged you?	When all the Expatriates from the Red Cross visits me at the hospital. They asked me how I feel and what were my needs. I told them a mobile phone for me to communicate with my family, a radio to listen to the news. Indeed they brought it all for me including 1,000 credit. Of course, food was always available.
10	Ga5	30-39	M	2015-01-27	2015-02-14		The day I was discharged from the ETC. This made me see my family. I was given items like a foam mattress, pots, drink bucket, cups, spoons, one bag rice and cash. 150,000 leones.
11	Gb6	30-39	M	2014-10-07	2014-10-18	About the admission. How did they know about your health? Were you afraid to come? Did people have to convince you?	I was working at the ETC as a driver. I was assigned to transport all equipment to the ETC. I was then assigned to collect an infected nurse who called at the ETC. He was unable to walk by himself. F., our boss by then, gave me the order to ga and collect the patient. We drove from the ETC to Kenema and a nurse called Ma. Let us collected the nurse M. who later died. After one month I felt sick a…
12	Ga6	30-39	M	2015-01-27	2015-02-14		I contacted the virus through a girlfriend of my. She died and I was a couple of days with the crops at home. I was taken to one local center like 4 miles where I abscond quietly to Kenema with my children. Voluntarily I reported myself at the governmental hospital. They took me yo the ERC and my whole family was quarantines. But the girlfriend of me died.
13	Gb7	30-39	M	2014-10-07	2014-10-18	How was the ambulance drive?	I am an ambulance driver. But when I contacted the virus the driver who took me to the center was very wicked. They were driving very rough not even about somebody in the vehicle. I was locked up from Kenema to the treatment center. I open part of the window to get fresh air.
14	Ga7	30-39	M	2015-01-27	2015-02-14		In the first place you are sprayed with chlorine and the will not care if you are alive. They drive roughly, even on rough roads.
15	Gb8	30-39	M	2014-10-07	2014-10-18	How was the contact with you family?	We were talking through the mobile phone that the expatriates brought for me.
16	Ga8	30-39	M	2015-01-27	2015-02-14		We were talking face to face. But only that there were barrier between us. We usually talk frequently. (three times a week).
17	Ga9	30-39	M	2015-01-27	2015-02-14	Did family visit you How was that? How did you feel?	I was very happy when I saw my family- especially my wife who usually pay visits to me. For my children we speak on phone.	Happy
18	Gb9	30-39	M	2014-10-07	2014-10-18		Only the expatriates and staff from my office visited me. My family did not visit me because they were in quarantine and the transport is too costly.
19	Ga10	30-39	M	2015-01-27	2015-02-14	How did you hear your test was positive? What feeling did it give to you?	Nobody told me about me contacting the virus –because I was taking immediately to the center. I only came to know few days before my discharge. I was not given any result earlier.
20	Gb10	30-39	M	2014-10-07	2014-10-18		They did not tell me any result until when I was about to discharge. I was tested though. I felt discouraged
21	Gb11	30-39	M	2014-10-07	2014-10-18	How was your contact with the workers? Expat? Local?	My contact with the workers and expatriates was very cordial. Even to rate, it was 100%
22	Ga11	30-39	M	2015-01-27	2015-02-14		They were all very caring. No discrimination. Even with the expatriates.
23	Gb12	30-39	M	2014-10-07	2014-10-18	How was the interaction between the workers?	As I was seeing they were working in harmony. Wherever you see a white, a black must be within.
24	Ga12	30-39	M	2015-01-27	2015-02-14		Definitaly their interaction was very cordial. If it were no very cordial, nearly everybody in this country would have passed away.
25	Gb13	30-39	M	2014-10-07	2014-10-18	Did people give up close to you? Can you tell something about that?	Yes, one person by the name of Mo., a prison officer, died. He was the only person with whom I shared the ward. I was really in shock.
26	Ga13	30-39	M	2015-01-27	2015-02-14		In the ward were I was, one person died but the identity was unknown.
27	Gb14	30-39	M	2014-10-07	2014-10-18	What were the most difficult situations?	The most difficult situation during my staying was when a patient who was close to me screamed and later I did not see him again. I was confused is he had died or not. Or were he was taken.
28	Ga14	30-39	M	2015-01-27	2015-02-14		When they were saying that there is no drugs for the disease, but when taking to the center was giving drugs. I feared to use those drugs by then. That was a difficult situation.
29	Gb15	30-39	M	2014-10-07	2014-10-18	Can you tell something about your discharge? How was it?	During the time of discharge, I was not able to walk properly and even to have my bath. I was not given any drugs to be using. The only thing that was given was food. I cannot call it discharge because I was not cured.
30	Ga15	30-39	M	2015-01-27	2015-02-14		According to medical aid, discharge is when someone is free from a sickness. It did not happen so we are now given timeframe. That come August 2017, no more free drugs for Ebola survivors.
31	Gb16	30-39	M	2014-10-07	2014-10-18	Did you get any help from the ETC to process your difficult experiences? Did it help?	No, I am a driver. The amount that was given to me had not finished and now I am out of job. I am a driver.
32	Ga16	30-39	M	2015-01-27	2015-02-14		No help. The only thing is after every month, people visits me and talk to me and my family. I am out of job now. Very though situation with me now.
33	Gb17	30-39	M	2014-10-07	2014-10-18	What were your needs in this?	We were thinking that we as survivors will be taking care of through paying the fees for our children. Reinstate us to our jobs we were doing
34	Ga17	30-39	M	2015-01-27	2015-02-14		Provide employment for us as survivors. Pay our children’s school fees, supporting our women with household items.
35	Gb18	30-39	M	2014-10-07	2014-10-18	If you talk with people about the ETC, what is the biggest misunderstanding that people have?	The community will not believe any word we tell them. One they have no trust in us about the existence of the virus. They thought that it was a bargain between us and the expatriates to make money. That even our former we were with now isolate and stigmatize us.
36	Ga18	30-39	M	2015-01-27	2015-02-14		We are seen by the society as false declarers of Ebola. We were not really expecting such but community still do not believe the existence of Ebola. Our relatives have still mixed feelings about us.

## Sheet: Dressers
FOCUS GROUPS_DRESSERS (persons 4, statements 38)
RUN NO	CARD NO.	AGE RANGE	SEX	STATUS	OCCUPATION	QUESTIONS	ANSWERS	BODY RESPONSE
1	Aa1	30-39	M	Head dresser	Researcher	Who were the dressers?	Anybody assigned/employed to treat an infected Ebola patient was a dresser.
2	Ab1	30-39	M	Dresser	Unemployed		They are those people were employed to take care of infected people very carefully.
3	Ac1	20-29	M	Dresser	Unemployed		They are who were train for the job because they better know and can withstand the situation once dressed properly.
4	Ad1	40-49	F	Dresser	Unemployed		They are those that were employed to do work and were paid.
5	Ac2	20-29	M	Dresser	Unemployed	What categories of dressers were there?	In the initial stage there were categories but as the infection increases, everybody was now place in one category for treatment. Everybody was considered as an IPC and we rotated every shift what your task was.
6	Ac3	20-29	M	Dresser	Unemployed		There were no categories at the time line was employed. Every worker was to do all the work; there was no job description.
7	Aa2	30-39	M	Dresser	Researcher		The dressers were not categorized as men and women. What matters was more to share lives.
8	Ac4	20-29	M	Dresser	Unemployed	What were the functions of the dressers?	To check in the stock if the materials to use are in place; the cloves, all plastic they wear, boots, etc.
9	Ad2	40-49	F	Dresser	Unemployed		Before dressing a patient, make sure everything is in place, because it is very risky. That is why there was a mirror at the dressing room.
10	Ab3	30-39	M	Dresser	Unemployed		We watch at the patient very closely before dressing. If you have sore we will not dress you. We will again write your name everywhere and there is a clock that tells the time.
11	Aa3	30-39	M	Head dresser	Researcher		To ensure the protection and safety of all the staff entering the high-risk area. You are responsible to take care of all the person in centre.
12	Ad3	40-49	F	Dresser	Unemployed	What clothing materials were used to dress those entering the high-risk area?	We cannot call it clothes. It was very hot to stay. Even for 30 minutes for your body.
13	Ac4	20-20	M	Dresser	Unemployed		Insisted that you cannot call it clothes. If it was, everybody would have wore it. It was only plastic.
14	Aa4	30-39	M	Head dresser	Researcher		It were not clothes, It was called Personal Protective Equipment (PPE). It was called this way because it could not allow any disease to come in because of the heat.
15	Ab4	30-39	M	Dresser	Unemployed		We have goggles, apron, rain boots, masks, caps et cetera.
16	Ac5	20-29	M	Dresser	Unemployed	How long were they supposed to stay in the high-risk area?	The maximum was 30 minutes. If it exceeds that, you will be out of oxygen what can result to death.
17	Ab5	30-39	M	Dresser	Unemployed		Actually is 30 minutes, but for serious emergency issues, you could stay more than 30 minutes. We sometimes bearer with serious constrains.
18	Aa5	30-39	M	Head dresser	Researcher		To avoid the high-risk of infection we informed them so they knew about the time and there will be time to alarm for your notification.
19	Ac6	20-29	M	Dresser	Unemployed	Were there people that wanted to stay longer than the stipulated time?	There was nobody wishing to extend his/her time. But to save life we can manage to bear with the time. That was in fact while we were having shift. Due to the shift changes, the IPC’s and nurses had to stay for a longer period in. The expatriates were very clever; they set all supplements from stock for us.
20	Aa6	30-39	M	Head dresser	Researcher		The local and expatriates were all working together. But they were very much time conscious. They remind us always about the time.
21	Ad4	40-49	F	Dresser	Unemployed		It was the expatriates that ally our fear. They started the dressing and we later followed them. So when we saw they were not afraid, we did not become afraid anymore as well.
22	Ab6	30-39	M	Dresser	Unemployed		The expatriate was very conscious of time. They were on any dressers’ PPE the time he/she will use. So the time was everywhere and many clocks were around. When it expires you will know.
23	Ac7	20-29	M	Dresser	Unemployed	Were there penalties for those who stayed over time?	Yes the penalties were: Advising you as it create problem for you. We did not want to say that they were not doing right since it discourages the people.
24	Aa7	30-39	M	Head dresser	Researcher		As we were eager to wear the PPE, there was no punishment. The only thing you were not allowed to wear it again.
25	Ad5	40-49	F	Dresser	Unemployed		When there was serious work, you stay in. But you will be suffocated and will collapse. (somebody collapsed once)
26	Ab7	30-39	M	Dresser	Unemployed		I was dressing someone that heard a patient talking in Kono who was infected. The person I dressed responded in Kono, so that made no language barrier what was present with many Kono patients. That made the worker staying longer in the high risk. They did not make him leave.
27	Ad6	40-49	F	Dresser	Unemployed	What were the reasons given by those who stayed over their stipulated time?	There were certain situations due to the care of the patients that made you stay longer. Like a toilet visit or a vomit on the ground. Before they handed over the shift they finished, they should have cleaned it.
28	Aa8	30-39	M	Head dresser	Researcher		If there was an injury found on the body, the person was not allowed to be dressed and to go inside the high-risk area. With the consequence that not always enough people were available. Then the people had to stay in longer time.
29	Ab8	30-39	M	Dresser	Unemployed		With an unexpected death just before the end of your shift. You had to take properly care for this body before your shift ends. This added more time to the time you were in.
30	Ac8	20-29	M	Dresser	Unemployed	Did you tell them that they did not follow the procedure?	We usually advice that of their first staying longer, but since we had humanitarian feeling, we also stay to see that patient are properly taking care of. We could not be annoyed because you would discourage your colleagues.
31	Aa9	30-39	M	Head dresser	Researcher		Expats organized now and then emergency meetings for sensitization of the IPC and nurses. Tell them about the time in using PPE’s. We don’t want them to be annoyed with us whilst entering the dressing room.
32	Ab9	30-39	M	Dresser	Unemployed	What were the general experiences you had while serving as a dresser?	You have to be mannered to your boss and even the patients. You must undergo some form of training. Not to be temperamental.
33	Ac9	20-29	M	Dresser	Unemployed		Initially people were frightening and did not participated. But after frequent sensation that the job was caring and there is no need to fear, we accepted it. (One of my friends even left because of intimidation.) At the end there was unity among the workers. We were doing the work in team.	Happy
34	Ad7	40-49	F	Dresser	Unemployed		As a woman, people were asking me if I can do the work. In the first place, fear was created in me. I could even not sleep at night. But as we used to work, we effectively did it. I was really astonished when I was sucked.
35	Aa10	30-39	M	Head dresser	Researcher		We learned a lot of experiences; if I am to name it I will finish two or three books. But for this interview we learn. About team work, how to manage emergency issues, marginalized situations. We also learn how to treat patients and how to take care of stresses (as we were sidelined in our homes. With our wives and children)
36	Ab9	30-39	M	Dresser	Unemployed	Are there any memorable events you wish to share with us?	This work had given me a very big problem even now. Where I used to stay I am not there again. My landlord died due to Ebola. Towards this I was totally pushed aside. Even now I am staying in a government house.	Happy
37	Ac10	20-29	M	Dresser	Unemployed		Much appreciation to Sierra Leone Red Cross Society for creating job facility for me with ETC and other associated non-governmental organizations.	Happy
38	Ad8	40-49	F	Dresser	Unemployed		Bravo to the Sierra Leonean Red Cross Society for still creating job opportunity for me although I have carry age. Up till now I am called upon for any volunteering work or interview, even for this one.	Happy

## Sheet: MIxed workers
FOCUS GROUP_MIXED ETC FOCUS GROUP (sprayers, hygienists, supervisors)
RUN NO	CARD NO.	AGE RANGE	SEX	QUESTIONS	ANSWERS	BODY RESPONSE
1	Ea1	30-39	M	How did this organization differ from a regular African organization?	There would not have been a perfect structure if the Africans [had] structured the organization.
2	Eb1	30-39	M		It would have been a disaster if the organization would have been developed by the Africans. When the blacks were in charge before the intervention of the expatriates there was no proper structure [KGH] which caused a lot of death. With the introduction of the ETC even workers could benefit like money wise.
3	Ec1	20-29	M		Because Africans had no better knowledge when the Ebola broke out; that was why death rate was high. With the introduction of the expatriates we had lots of training, which helped us able to combat Ebola.
4	Ed1	30-39	M		When the organization was in the hands of the Africans, we never had training because there was no one to train us. But when the expatriates came, they trained us and perfectly segmented the ETC [intake] into “suspect”, “probable” and “confirmed”. We were highly motivated since we received money.
5	Ee1	20-29	F		The Africans never had chance to even encourage the workers and the patients as well, but when the expatriates intervened encouragement was given to both staff and patient.
6	Ea2	30-39	M		When the ETC was established at Kono by the Africans there was a hIgh rate of death. When A. (manager [of Kenema] ETC) was sent to Kono she changed the whole system from how it was to a better standard [of living].
7	Ef1	20-29	M		When our African brothers were in charge, there was lots of complacency. But when the expatriates came in they established standard operating procedures which helped staff to control the movement [through the ETC].
8	Ea2	30-39	M	How was it that you had to shout to each other in the high-risk?	We had two types of communication carried on [in] the ETC - verbal and non-verbal. We entered the high-risk area as a team, which makes it easier for us to communicate. There was not much shout[ing], we used many gestures and body language. Those at the low-risk area could easily communicate without shouting to ones at the high risk area.
9	Ef2	20-29	M		The ETC was well and properly segmented into the high-risk areas and low-risk areas, divided with only a fence constructed by wire. There was no need to shout. We concentrated on body language.
10	Ee2	20-29	F		Most of the time our names were written on blackboards and our duties outlined so there was no need even to ask anyone. That was the main way we communicated.
11	Ed2	30-39	M		We never spoke high/shouted. We concentrated on communication through demonstration. When you talk much [a lot] the goggles on your face will get fogged, which will give a poor view.
12	Ec2	20-29	F	How was the workload? Could you do everything with the people on duty?	The work was divided amongst staff, no one did all the work at the ETC. Jobs were assigned to people.
13	Ea3	30-39	M		Sometimes workload increased. The more patients we had the more workload we had.
14	Eb3	30-39	M		When on duty what ever job you were faced with is what you will preform; e.g. if someone died during your turn of [duty] you prepare the dead body management.
15	Eg2	40-49	M		Workload at the dressing room was more tedious than elsewhere.
16	Ee3	20-29	F		The more people that entered per day the more our job increased at the undressing section.
17	Ed3	30-39	M	Do you have the feeling that you were working in one big team or the teams were working in good collaboration?	To my knowledge working with the Red Cross I thought I was working with the whole world. Even at the centre we had a big team to work with the locals and expatriates [and it] was wonderful. We had social workers, IPC center etc.
18	Eb4	30-39	M		Because we worked in a big team that was even the reason why we succeeded. We had a slogan which says: ‘team spirit, team work’. We interacted and were supportive at all times.
19	Ec3	20-29	M		We had a very good communication management. People staff were always willing and eager to assist at any point in time.
20	Eg3	40-49	M		If there had not been any team-work we should not have had the meeting and discussion of today. We often had coordination meetings with the team.
21	Ed5	30-39	M		Because of the coordination meeting we held that was why I felt we had worked with a very big team. The supervisor always met with his/her team to ensure they were fit for the job for that day, to avoid people been affected by evacuation.
22	Ef3	20-29	M		We had different components headed by supervisors, which means I was working with a very big team.
23	Ed4	30-39	M		We did “blow mind” to help us control the stress of others and always make sure we had debriefing to ensure that people know exactly whether [what] they are doing.
24	Ea4	30-39	M	Did it take a while before the organization was running smooth? What was needed?	We started the organization in September and underwent two weeks of training. We were in the training when we started visiting the site. There was a transition period, it was not too effective. We had different sectors under IPC like BDM, hygienists etc. We found it difficult because we had not enough equipment to work with. All sectors were brought together and was called infection prevention co…
25	Ed5	30-39	M		Even the training went by segment. I was called for training, which I was afraid to join and I vane [failed?] in the second phase because afraid to die. The first day I was deployed I started building confidence because what was said outside was different from the reality.
26	Ee4	20-29	F		Initially in the sprayer room the sprayer given to us was not good and [too] strenuous to work with until expatriates came. Then we were comfortable working with what equipment that was given to us. The canteen we used initially was small but as time went by it was added upon.
27	Ec4	20-29	M		When climbing into the ETC initially was strenuous but a step was added which eased the climbing. There was no laundry service before [at first]. After two weeks this [service] was hired.
28	Ef4	20-29	M		Initially I was afraid but the day I came in contact with a patient who I tot[ed] [carried] on my back the fear went. Later, stretchers were brought in to carry sick patients.
29	Ec5	20-29	M	Did you sometimes know the patients? How was that?	There was a patient brought in from [Ny]andeyama. I knew him before he was sick. It was shocking to see someone you know that is brought in. When they took him to the centre he refused to eat because he thought it was toxic [poisoned], but the moment I went to him and talked to him he felt comfortable and was free to speak to other members of staff. He got well and was discharged. If you know the…
30	Eb5	30-39	M		I knew K. He was one of the ambulance drivers who had direct contact with a sick patient from one of the communities. He got infected and was taken to the ETC. He was free to talk to me and listened to me more.
31	Ef5	20-29	M		There are certain times we did not know the patients but through interaction we would know them.
32	Ec6	20-29	M	How did the process feel of the expats changing procedures? And that they were looking at you? Did you perform better?	The experts brought changes in the process because of their vast knowledge they had. Initially when the Africans were at [the] control there was not much specialization.
33	Ed6	30-39	M		I think it was the will of God.
34	Eh1	30-39	M		The sickness was new to us in this part of the world. God and the knowledge of the expats brought improvement.
35	Eb6	30-39	M		The expatriates brought improvement. When the sickness broke out nobody knew anything about Ebola in Sierra Leone, but those who came as expatriates changed the system. The white guys were very sympathy[etic] and loving. We felt appreciated. Most of all, they had money to do the intervention.
36	Ea5	30-39	M	How was it that the white people changed sometimes?	When the local staff was in charge they had no way to distinguish between the adults and the children, but when the expatriates came in they established a special area for the children - the kindergarten.
37	Eg4	40-49	M		The expatriates were innovative and embarked on continuous assessment by having meetings with supervisors and gave training when the need arose.
38	Eh2	30-39	M		The experts gave more financial and morale support. They even listened to the ideas of the local staff. They bring money to [effect] changes.
39	Ee5	20-29	F	What things did you keep secret? And from the expats?	We did not discuss the DBM [with] the family members and even the community.
40	Eb7	30-39	M		I kept my working with the ETC secret; because of that it will not be known so I would not be driven [out of my house?]. I never disclosed the identity of patients to outsiders.
41	Ec6	20-29	M		I kept secrets on material damage from the whites. The expatriates [had?] their been affected secret. Even when one fell sick they will not tell the local staff.
42	Ef6	20-29	M		I kept my professional information secret. I observed my medical information system. I never disclosed my personal information.
43	Ea6	30-39	M		I always kept the condition of patients secret. Especially when taking care of them while changing napkins etc.
44	Eh3	30-39	M		Welfare in terms of salary was kept secret. Especially when salaries were knifed we never told the expatriates because [we were] afraid to be sacked or lose the job. [they did not pay the taxes]
45	Ef7	29-29	M	How were the days when you had sixty patients?	We were exhausted and overloaded. It was challenging.
46	Ee6	20-29	F		We worked overtime, which we were not paid for.
47	Eh4	30-39	M		We used a lot of materials and equipment, e.g. food. Even the kitchen experienced the busy times.
48	Ea7	30-39	M	How was the news spread about M.	My team as a supervisor was on duty. M. had urine retention. A., one of the staff, met with M. and told me at the low-risk area. Everybody was called for a meeting where the news was shared. So it became soon a rumour for all workers that were not on duty. Expats organized a meeting all together. The news of the death of M. was not good for us at all. We felt bad and sad. It took us two days with…
49	Eh5	30-39	M		The news was bad to us. Even those in Kono were afraid to work.
50	Ea8	30-39	M	Could you tell about the time you were in quarantine?	All the staff on duty were quarantined. They never felt good. M.’s mother died because of the news of her son’s death.
51	Ed	30-39	M		The atmosphere was full of tension. Everybody had deep fears.
52	Ec7	20-29	M	How were the last two months when the ETC was almost closed? How did it go?	No patients were received. We stopped the night shift and it came to the time when our presence was only felt in the mornings.
53	Ed7	30-39	M		Some of us never wanted the job to come to an end, because that was our only hope of sustenance. We know that we will be soon out of job. But at the same time we felt happy because the sickness was coming to an end.
54	Ef8	20-29	M		We were idle [?] and the people were happy.
55	Ee7	20-29	F		We went only to eat and dance. The expatriates gave us gifts and training. There was a cheerful atmosphere.
56	Eh6	30-39	M		They had wanted to cut on the number of staff especially those that were in Kono. Our rotation was reduced.
57	Ea9	30-39	M	What improvements could have made it better?	All the nurses that were trained on the infection prevention control must have been trained by government and retain them for any eventuality.
58	Eh7	30-39	M		The government made delay in handling the Ebola outbreak it would have been better to attack it before the spread.
59	Ed8	30-39	M		They should improve on information that is disseminated at any point in time because information is power.
60	Ef9	20-29	M		The expatriates should have intervened promptly, in recruitment and enhance[ing] good/better condition of service.
61	Eb8	30-39	M		The government was slow to react on the news of the breakout of the Ebola epidemic. Government should have a trained set of people (nurses) who will be on stand-by for any eventuality. The government must maintain staff trained, if not all, for any eventuality or emergency. We should have closed all borders when we knew about the existence of the disease.

## Sheet: Social workers
FOCUS GROUP_SOCIAL WORKERS (3 persons, 33 statements)
RUN NO	CARD NO.	AGE RANGE	SEX	STATUS	OCCUPATION	QUESTIONS	ANSWERS
1	Ca1	30-39	M	Social worker, translator	Teacher	Would everybody be able to do this job?	Yes, I believe during the time we were up to do this task. Initially there were challenges faced but at the end we were able to overcome. Nobody else would have done it. But most difficult was to tell relatives about the death.
2	Cb1	30-39	M	Social Worker, translator, data collector	Social worker		We had many fairs at the beginning. The expats had trained us. We were able to do it since we were recruited. That is even the reason why we were giving certificate of merits at the end of the endemic.
3	Cc1	20-29	M	Social worker, data collector, translator	Teacher		First of all you need to be trained and strong. It was hard to start, because challenges were faced because of lack of equipment, logistics and materials to use. When the job was already difficult, it became even more difficult. It was impossible to go to all the communities. But nevertheless we succeed and were given certificates and merits.
4	Cb2	30-39	M	Social Worker, translator, data collector	Social worker		When the Ebola broke out, we were translators but as time went by they thought of transforming the translator job into social worker.
F	Cb2	30-39	M	Social Worker, translator, data collector	Social worker	Could you be an effective social worker already right from the beginning?	When the Ebola broke out, we were translators
6	Ca2	30-39	M	Social worker, translator	Teacher		As my brother wisely said, there is an adage which says ‘planning before the battle that differs from when in the battlefield”. I was a data collector, but the jobs assigned were interwoven. Therefore the community health mobilizer (CHM) was formed because of the similarity of the different jobs. And were used and became interested.
7	Ca2	30-39	M	Social worker, translator	Teacher	Did you have enough experiences for this job?	My first experience I learnt from the Ebola outbreak was that I learnt from the medical professionals we had were not well trained and our medical structure was sub standard. Because of that I learnt that only Sierra Leoneans could make it work for themselves. Another experience I had was that I learnt different jobs and at the same time I traveled the length and the width of the country. At the …
8	Cb3	30-39	M	Social Worker, translator, data collector	Social worker		I was not trained at all before the ETC was established. But nobody knew much. By doing we learnt what made the death rate falling down. One key thing I learnt is that when the break out occurred it was new and that we were not prepared and nobody never knew about the Ebola virus. Most people died because they thought when you caught the Ebola virus you have no option left than to die. So the int…
9	Cc2	20-29	M	Social worker, data collector, translator	Teacher		There was an adage which says ‘it is not the wickedness of the people that destroys the community but the silence of the wise ones”. That to a great extent caused the spread of Ebola in the country. People that were wise about Ebola kept quiet about it. Therefore the Ebola spread like a wild fire in the Harmattan. The second thing I learned is the experience of the death. You see people who conso…
10	Ca3	30-39	M	Social worker, translator	Teacher	Who did you give your service to?	When we started the job, we rendered our service to the nation and the expatriates that flew into the country. We also rendered our service to the affected patients, like getting close to the perimeter fence and gave them food. We also helped to compliment the government’s effort of bringing Ebola to a speedy conclusion.
11	Cb4	30-39	M	Social Worker, translator, data collector	Social worker		I am going to put it in these categories; the patients mostly, co-workers (local & expats), communities around the ETC and patient’s relatives also were directly connected to the patients. We spread messages that helped reduce the spread of Ebola. Even though some people were not happy when the Ebola came to an end because of fair of losing their jobs.
12	Cc3	20-29	M	Social worker, data collector, translator	Teacher		We as social workers, I gave message to Geneva head quarter through magpi software; (a program that was specially designed to send messages to Geneva and other expatriates). We render service to the patients. We realized that more Muslims were affected than Christians. Reason I cannot tell. What I experienced is that Muslims kept it most often secret. We noticed that there was a lot of ignorance …
13	Ca4	30-39	M	Social worker, translator	Teacher	How was it to go to the communities?	Low infected communities did not want to receive us. They did not believe in the disease. The only thing what they believed is that if it would exist, we would have brought it to the community. This was totally different with the highly infected communities. They sympathizing us and they discharged very welcome. We went to the communities in pair. We often go to the communities when there was a d…
14	Cb4	30-39	M	Social Worker, translator, data collector	Social worker		It has been very challenging. They saw us for being responsible for there loved ones. We came there at the beginning on the bike, but we changed it soon for the ambulance. But this was all not really helpful, so we hired vehicles and made placed a paper that we were from the Red Cross. The survivor together with the social worker went together to the communities.
15	Cc4	20-29	M	Social worker, data collector, translator	Teacher		We never used bikes. We always used vehicles to take the survivors to the communities.
16	Ca5	30-39	M	Social worker, translator	Teacher	Can you tell about your experiences in the community?	Some communities welcomed us but others were hostile. We had to go though the chiefs and/or stakeholders in the community who in turn will talk to them. Sometimes people in communities go on ran page and throw stones at our vehicle. To my dismay up to now some people do not believe there was Ebola. Some people (survivors) did not even want to leave the ETC when they were discharged. They wept.
17	Cc5	20-29	M	Social worker, data collector, translator	Teacher		It was a big challenge; we really used our skills to get accepted. What helped were the certificates for showing that they are real survivors.
18	Cb6	30-39	M	Social Worker, translator, data collector	Social worker	How did you feel about telling people need to stay in quarantine or go to the ETC? Did you feel betraying them?	I personally thought people were not happy. At a certain time, people fekt that we were giving money to keep them at home or deprived them from their freedom of movement. Some to certain extent attacked us physically. We were therefore not in their good books. They were not comfortable and felt betrayed, not until the death of our only doctor who knew about Ebola died.
19	Cc6	20-29	M	Social worker, data collector, translator	Teacher		Initially due to the refusal of people to accept survivors, the management thought it wise to give certificate to those who were discharged. People were not happy when they were conveyed to the ETC. Especially when a high concentration Chlorine was used. Chlorine made them weaker. When they found that out, they I felt bad. How they thought about was negative. I could not say they felt we were bet…
20	Ca6	30-39	M	Social worker, translator	Teacher	How did the people in the community receive you?	In certain communities we were highly accepted and welcomed. Places like Komende Luyama, Kono and Port Loko received us well because of the death full they enusaged during the outbreak. They were anxious to get help from expats and medical practitioners. Like in Kenema, people never appreciated us and had negative thoughts about us. They thought we were betraying them. They saw us as spies.
21	Cc7	20-29	M	Social worker, data collector, translator	Teacher		People were hiding themselves in case they had a head age.
22	Cb7	30-39	M	Social Worker, translator, data collector	Social worker	What kind of imagination did people have of the ETC?	Through visits we made, we came to realize that people had negative thoughts about us. Reason being that they thought we burry more than one dead body in one grave (mass grave), people were given infection to patient to die and never come back again.
23	Cc8	20-29	M	Social worker, data collector, translator	Teacher		The initial proposed site for the ETC did not materialize why because people thought were ever the ETC were located those living in that community will die. Even where the ETC was located they had to go through many claims before the community people accepted. When there were more discharges, what was communicated through radio, there was more trust. They had more trust than in other health facil…
24	Cc8	20-29	M	Social worker, data collector, translator	Teacher	How was it to talk with the patients?	That brought me to a question I was asked during interview: “If you had a pen and book and a sick person needs to talk to you, what would you do?”. It was not easy at all. I found it very difficult and had many fairs to talk. Not anymore when E. delegate gave me the assurance that even if I was close to the boundary of the high-risk area, I was still OK. So I was careful and I learned to see deat…
25	Ca7	30-39	M	Social worker, translator	Teacher	Could you make a difference? How could you see that?	In the ETC we made a difference. Initially when the ETC was not established people died a lot because of ignorance. But when the ETC was erected, expatraits came in with professional advice which reduced the deaths.
26	Cb8	30-39	M	Social Worker, translator, data collector	Social worker		Compared to other centers, less people died in the ETC. We had enough equipment when the Red Cross intervened. Unlike the government, they had scarcity equipment, which was not enough to handle the situation. Another difference was the introduction of the ambulance and the use of chlorine in the ambulance. Unlike before too much chlorine was used which caused a lot of death.
27	Ca8	30-39	M	Social worker, translator	Teacher		Another difference is that before the introduction of ETC too many nurses died because of lack of knowledge, but when established the death toll was low.
28	Cc9	20-29	M	Social worker, data collector, translator	Teacher		We could establish much more confidence. The experience of chlorine could be changed when you use after disinfecting fresh water. That is what we did later.
29	Cb9	30-39	M	Social Worker, translator, data collector	Social worker	How was it to talk with the workers?	We find it difficult to talk with the workers especially when M. died. That to a large extent made the entire workers to unceremoniously leave the ETC and go home. During that time, nobody listened to anybody. It was challenging because we were all in tears.
30	Cc10	20-29	M	Social worker, data collector, translator	Teacher		We talked frequently to the workers. We had regularly meetings. I did not experience any problem until the death of M. Before people were encouraged that we as workers could never be infected, but than this statement was contradicted. They thought who is the next that die. Workers became more isolated and did less accept us. So this changed a couple of times.
31	Cc11	20-29	M	Social worker, data collector, translator	Teacher	Could you make a difference to the workers? How could you see this difference?	The difference was negative and positive as well. The negative aspect was we were isolated by family members, parents and loved ones. We were driven from homes by landlords. The positive side was we were appreciated by those that rejected us because there was money flowing. We automatically became the breadwinners. Some people are now employed with other organizations as we speak and are doing we…
32	Cc12	20-29	M	Social worker, data collector, translator	Teacher	Could you process it all yourself?	We processed it through faith and determination. Coordination was the key word to watch because we had to interact with other workers. They say it is an island, and therefore you cannot stand-alone. Further we got a training about how to process the experiences what really helped.
33	Cb10	30-39	M	Social Worker, translator, data collector	Social worker		Due to coordination in the team, we shared info with each other and that made us able to process it.

## Sheet: Cooks
ETC cooks	5 people	35 answers	2017-06-28
RUN NO	CARD NO.	AGE RANGE	SEX	STATUS	OCCUPATION	QUESTIONS	ANSWERS	BODY RESPONSE
1	Ba1	40-49	F	Cook	Housewife	How do you see cooking in the ETC compared to somewhere else?	Cooking in the ETC was on very large scale compared to cooking in our homes. At home, five or six cups of rice is cooked. But at the ETC one bag or one and a half is cooked. So at home you consider proportions. There was an enormous or great heat at the ETC. I was very much scared because of the risk involved in contacting the disease.
2	Bb1	30-39	F	Cook	Housewife		We had training before we started cooking. But in our homes we undergo no training. The too much heat from the fire even now is effecting my eyes. The plates from the low risk were disinfected before washing. The cooking was a difficult task.
3	Bc1	40-49	F	Head cook	Housewife		The water at the ETC was disinfected with chlorine. There were three types of chlorine mixtures. We had taps that were labeled green, yellow and red. The differences were due to the level of chlorine concentration. The method of serving the food was quite different from elsewhere. There was a boundary between us and those who served.
4	Bd1	50-59	F	Cook	Housewife	Did you get any feedback from the patients about the food?	Yes, we got feedback from the patients. Firstly the messages were relayed through the nurses to us. Later, the patients upon discharge came and thanked us for cooking. The patients appreciated cassava and soup and disliked corn soy blend parp because it gave them diarrhea.
5	Be1	20-29	F	Cook	Housewife		Feedback from the patients came from the patients through the nurses. The patients told the nurses to inform us of the type of food they like and those they don’t like.
6	Bc2	40-49	F	Head cook	Housewife	Did you have the feeling you were informed enough about the risks and virus?	Yes, we were informed enough about the risk of virus; but with all the risks involved we sacrificed our selves just to safe our guard people.
7	Bd2	50-59	F	Cook	Housewife		We were aware of the risks of the virus, but we still went ahead to under take the job. Some of the risks were the people dying, risk of even loosing relations and close family relations.
8	Ba2	40-49	F	Cook	Housewife		Our close relations avoided our home because I knew the risk involved in working at the ETC. There was also a risk involved in signing our name because we use to do close to the high-risk area. When you entre you need to sign up your presence. We all used the same pen. That can brought a risk. But as well when I walk in the low risk. There had someone walked before that works in the high-risk. Th…
9	Be2	20-29	F	Cook	Housewife		At one point in time, we as cooks were on duty were quarantined because one nurse called M. died and he was so close to our kitchen.
10	Bd3	50-59	F	Cook	Housewife		People or workers from the high-risk always joined us on the same bus. Even the dishes from the workers in the low-risk area were brought to us.
11	Bb2	30-39	F	Cook	Housewife	Do you think there was a possibility to get infected with the virus?	Yes, I think there was a possibility to get infected with the virus because we use to share the same toilet with workers from the high-risk area. Also the dishes from the workers were brought back to our kitchen.
12	Bd4	50-59	F	Cook	Housewife		Yes, the exchange of cooking utensils and other materials was also a possibility to get infected. Once I went to the toilet and I came across with a vomit.
13	Ba3	40-49	F	Cook	Housewife		Sometimes people entered into our kitchen and even our store with PPE. And when we went to the store, we wore only one layer of PPE. And people did unconsciously not chlorinate all staff they gave us back.
14	Ba4	40-49	F	Cook	Housewife	Who were eating the food you cooked?	People who were eating the food were the patients, the workers, the cooks, and the expatriates. Later, when the risk was low, some neighboring villagers were also eating at the center.
15	Be3	20-29	F	Cook	Housewife	Did the workers come to you to have a chat?	At the peak point of the virus, there was no chat. Everybody was afraid for each other since you don’t know the status of your colleague.
16	Ba5	40-49	F	Cook	Housewife		The expatraits did not allow us to talk with each other. When the virus was more under control it was allowed. So we saw each other and chatted with each other when we were waiting for the bus to go back.
17	Bc3	40-49	F	Head cook	Housewife		We mostly have time after work to chat. On our way to the vehicle or when we were in the vehicle.
18	Bb3	30-39	F	Cook	Housewife	What triggered them to come to you?	When they were hungry most times let them to come to us.
19	Bd	50-59	F	Cook	Housewife		When they thought that they did not have enough food on there plates. They came back to ask for an extra scoop. But there was always enough food for everybody.
20	Ba	40-49	F	Cook	Housewife		A lot of work and tense made them hungry, so they came whether they could have a second plate. You could see that they had worked hard they were sweating a lot!!
21	Bb4	30-39	F	Cook	Housewife	Were the workers inpatient to get their food?	The workers mostly when they are hungry will get to the kitchen to worry us to get their food.
22	Bd5	50-59	F	Cook	Housewife		The workers come twice to get their food when the first service does not seem to satisfy them.
23	Ba6	40-49	F	Cook	Housewife	Did the workers ask for more food?	Yes, more so the cleaners ask for more food. Especially when the source is cooked is so delicious.
24	Bd6	50-59	F	Cook	Housewife	Could you easily stand the request of the workers?	Yes we were always able to with stand their request since there was enough food. There was more pressure on us that was why we divided the team into two shifts.
25	Bc4	40-49	F	Head cook	Housewife		Yes, the pressure on request of food even lead us to do over timing.
26	Bd7	50-59	F	Cook	Housewife	What procedures were present to prevent any contamination?	They told all our workers to stay in their own department and should not be roaming about. They also told us to avoid contacting ourselves.
27	Bb5	30-39	F	Cook	Housewife		Hand washing was encouraged with chlorine. Dishes were washed with concentrated chlorine to prevent any contamination. Everybody should place their plates after eating in a big bowl filled up with chlorine water.
28	Ba7	40-49	F	Cook	Housewife		Refreshers were trainings frequently held to teach us how to prevent any contamination. They trained us constantly how to hand washing, no hand shaking, also use chlorine to do cleaning, avoid body contact, avoid body contact, no exchange of spoons, plates, et cetera.
29	Bd8	50-59	F	Cook	Housewife		Daily body temperature were taken of all workers to ensure that contamination do not take place.
30	Be	30-39	F	Cook	Housewife		The floor was daily cleaned.
31	Be4	30-39	F	Cook	Housewife	Were these procedures all well followed?	When you come first in the morning, you have to wash your hands before entering the gate. We were monitored by the expatraites.
32	Bb6	30-39	F	Cook	Housewife		Yes, all these procedures were all followed. Has it not been that, all of us would have been infected.
33	Bd9	50-59	F	Cook	Housewife		Yes, people were there to ensure that all these procedures were followed. Eg. Daily body temperature control
34	Bc5	40-49	F	Head cook	Housewife		Because we followed all these procedures, that is why we were not infected.
35	Ba8	40-49	F	Cook	Housewife		The expatriates were very vigilant to make sure that all procedures were followed and to the letter.

## Sheet: Not-directly affected
Pastoral centre	Random group, 6 people, 11/7/17		No data on age, occupation etc.
RUN NO	CARD NO.	AGE RANGE	SEX	Education	OCCUPATION	community	QUESTIONS	ANSWERS
	Ia	30-39	F	J.s.s. 3	Trader		What is Ebola according to you? Virus, a story, reason to make money?	Ebola is a virus that is easily transferable from one person to another. It has symptoms that shows that it is Ebola.
	Ie							In my own view it is a disease that can move from one country to another through contact with a sick person.
	Id							Ebola is a disease that is got from human to human contact. Ebola is made to understand is got from animals like monkey, bat and contact with human beings that are infected.
	Ia.2							Most people especially the uneducated were saying that it is just a story for making money.
1	Ie1						Do you look in a different way to health facilities after the Ebola crisis?	Yes, I now see the health facilities after the Ebola crisis as improved as compared to the period before Ebola.
2	Ib1							Yes after the Ebola crisis our health facilities is more trusted now than before. Initially there was only one ambulance for the whole township. We now have over four or five and there has also been an improvement un the supply of drugs. This improvement was fast realized.
3	Ia1							We now thank God for the health facilities after the Ebola crisis. We use to buy cloves, syringes, and most of the medicines. Bit now you don’t buy that anymore. You don’t buy your medicines at the hospital anymore. That is more transparent. You buy them at the pharmacy.
4	Id1							Our medical facilities have greatly improved after the Ebola crisis in the supply of drugs, treatment and other services.
5	Ic1							For that fact that you have money you can purchase whatever drugs you want before and even after. It is no change
6	If1							Health facilities have now improved greatly as compared to the period before Ebola.
7	Ib2						How did you hear of the establishment of the ETC?	The ETC was located on the way to my village. So during my visit to my village, I came across the center and the bike rider told me it is an ETC.
8	Ia2							My friend told me about the ETC
9	Id2							We were travelling in a vehicle to my village and my fellow passenger told me that’s the ETC for our district.
10	Ie2							I heard the establishment of the ETC through radio station.
11	If2							My neighbors told me about the establishment of the ETC
12	Ic2							I don’t know about the ETC
13	Ie3					Happy	How did you feel about the establishment?	I was greatly happy to hear this good news simply because we now have the chance to take our sick people to the government hospital for the treatment other sicknesses, other than Ebola.
14	Id3							I was very happy to hear about the establishment of the ETC.
15	Ia3							It came to me as a good news to hear about the establishment of the ETC.
16	Ib3							We were happy to hear the good news of the establishment of the ETC. It is good that the patients were taken saperately.
17	If3							We were initially afraid to visit the governmental hospital for the treatment. I have to treat my sick child myself because I was afraid to go to the hospital. So the establishment of the ETC relieved me of my worries.
18	Ie4						How has the image of the ETC change when you know expats runs it?	When the expatriates came, the number of death of patients at the center drastically reduced. There were a lot of improvements because the expatriates know.
19	Ib4							We started getting survivors and reduced death rate when the expatriates came.
20	Id4							Our confidence in overcoming the virus was boosted by the coming of the expatriates.
21	Ia4							Nobody was surviving before the expatriates came. We started getting survivals after their arrivals.
22	Ia5						What image did you have at the beginning? How patients were treated? Why?	Our local staff were only given blind treatment to patients because they were not grounded in treating the Ebola virus.
23	Ies							The local staff were not trained in the treatment of the Ebola virus. The patients were blindly treated.
24	If4							The local staff were given treatment to the patients which they themselves do not know the function.
25	Ib5							We had that at the initial stage there was no treatment for Ebola and the patients were not properly treated.
26	Ie6						Did this change over time? How? Why?	Yes, it changed over time. The right treatment was now given to the patients and people were adhering to the by-laws.
27	Ia6							Yes, it changed over time because we started obeying by-laws since those were the ways to prevent the virus. Infections were reduced. People change their behavior. My father even kept me in quarantine for three days. I was not allowed to go to the market.
28	Ib6							Yes it changed over time by strictly adhering to the by-laws and patients were getting the right treatment.
29	Ib7						With what perspective do you look back to the ETC? Good, bad? Would you prefer this than other health faci?	The ETC’s establishments was good and the patients were well treated. Yes, I would choose for another health facility because the ETC reminds me always of my late sister. I think it is good that it does not exist anymore.
30	Ia7							I would want the ETC to be re-established, because we are hearing of monkey pox and other diseases which can be treated at the ETC. Patients were nicely treated at the ETC.
31	If5							The ETC helped us greatly and that is why I want it to be re-established.
32	Ie7							The ETC always reminds us about the number of people we lost through the Ebola virus. Therefore I wanted it to be re-located in another area.
33	Ie8						What good stories did you hear of the ETC?	When we started getting survivors at the ETC was a very good story to us.
34	Id7							As a result if the good treatment that were delivered, we started getting survivors. These survivors got a lot of presents.
35	If6							We heard that the patients were well treated and most them started surviving. This meant that the disease came soon to an end.
36	Ia8							The news of survivors discharged at the ETC was a good news.
37	Ib9						What negative stories did you hear of the ETC?	When the death toll was very high and the sound of the ambulance that were very negative stories.
38	Ia9							We heard that they use to remove patient’s blood, we didn’t know why. Also the high concentration of chlorine was killing too many patients.
39	Ie8						How did you hear about the first survivors? What feeling did this news give you?	I got the news about the first survivor through a radio and I was very much happy to hear. A survivor told his story.
40	Ia10							I heard the good news from a nurse who is our neighbor. I was greatly relieved.
41	Id8							I heard the news from a radio and I was happy.
42	If7							I heard the news from a radio and I was happy about it.
43	Ia11						Do patients & survivors have another image than the patients from another health facility? How? Why?	Those patients that and survivors at the ETC had no problems when discharged as compared to those at the government hospital who had hearing problems, speech and even some experience pain in their joins.
44	If8							The ETC survivors are very much normal as compared to the survivors at the government hospital who are still complaining of complications
45	Id9							There were vast differences between survivors and patients at the ETC and those at the governmental hospital- an adage was sited.
46	Ib10							The patients from the government hospital had some complications like mental retardation, speech and hearing problems. More the patients from GH shake the whole time with their head. But at the ETC, there were no such problems. It implies that the people there are better treated.
47	Ie							Less people are cured from the government hospital
48	Ib11						How do you look at the people that worked there? And about their payment?	They were brave people who sacrificed a lot to see that the Ebola crisis is over. They were well paid.
49	Ia12							I was envious of their earnings and because they were earning too much money.
50	Ie9							The way they were treating the patients. Even when they were highly paid, they still needed bribes before they could collect the dead bodies from the houses. Otherwise you were the last one they helped. I hated them so much.
51	If9							They were disrespecting the dead and were not buried properly and I hated them for that reason.

## Sheet: Family
FOCUS GROUP_MEMBERS OF FAMILIES OF SURVIVORS (3 persons, 40 statements)
RUN NO	CARD NO.	AGE RANGE	SEX	Relation	Education	Quarantined	Stay of relation	QUESTIONS	ANSWERS
1	Ha1	30-39	F	Husband	J.s.s. 3	Yes	3 months	What was your idea of the ETC before your husband got in?	The ETC was built purposely for the treatment of Ebola.
2	Hc1	30-39	F	Husband	J.s.s. 1	Yes	20 days		The ETC was built during the Ebola crisis and was built for the treatment of Ebola.
3	Ha2	30-39	F	Husband	J.s.s. 3	Yes	3 months	Can you tell something about the time your husband was taken up in the ETC? How did you hear about that? Did you accept him going to the ETC?	My husband was taken to the ETC on the 5th of December 2014. The matron of the governmental hospital told me this information. Yes, I accepted him going to the ETC for him getting any treatment.
4	Hb1	30-39	F	Father	J.s.s. 2	Yes, kindergarten ETC	3 months		My father was taken to the ETC. My mother told me this information. I cried when I heard this.
5	Hc2	30-39	F	Husband	J.s.s. 1	Yes	20 days		My husband was taken to the ERC on Monday which particular date I cannot remember. My husband called me with a different phone number and gave me this information. Even though I was not happy, I let him go in order to get proper treatment.
6	Ha3	30-39	F	Husband	J.s.s. 3	Yes	3 months	How was it they picked your husband up from your house? Everybody knew now he might be an Ebola patient.	Yes, my husband was picked up by ambulance from our house. Yes, everybody around us knew that my husband was an Ebola patient. Even the children were taken away to an orphanage.
7	Hb2	10-19	F	Father	J.s.s. 2	Yes, kindergarten ETC	3 months		Yes, my father was picked up by ambulance from our house. All my friends stayed away from me until I finished the quarantine period.
8	Hc3	30-39	F	Husband	J.s.s. 1	Yes	20 days		My husband was picked up by a van that was driven by a driver from the Red Cross to the governmental hospital. From there he was brought by ambulance to the ETC. I was informed by the medical workers from the ETC that my husband was Ebola positive. The moment the medical worker brought the news that my husband was Ebola positive, all my neighbors were around me and received the news as well. They…
9	Ha4	30-39	F	Husband	J.s.s. 3	Yes	3 months	How did the community react on you?	The community stayed away from our house. They stopped using the same water we used. They closed the waterwheel for us. Stopped talking to me. The community were abiding by the by the community by-laws.
10	Hb3	10-19	F	Father	J.s.s. 2	Yes, kindergarten ETC	3 months		I was taken to the children’s quarantine center. So I did not have contact with the community.
11	Hc4	30-39	F	Husband	J.s.s. 1	Yes	20 days		Our neighbors refused receiving moneys from us even when we bought what we needed most. There was no close collaboration between us and the community.
12	Ha5	30-39	F	Husband	J.s.s. 3	Yes	3 months	How was the goodbye with your husband?	He presented all his documents to me because he didn’t know if he was going to come back alive. It was so emotional and we both cried.
13	Hb4	10-19	F	Father	J.s.s. 2	Yes, kindergarten ETC	3 months		My father cried and I cried too seen my daddy going to the ETC.
14	Hc5	30-39	F	Husband	J.s.s. 1	Yes	20 days		My husband told me to pray for him and let me be calling him on a certain phone number which was given to me alone. I told him that I was not happy with the way this talk. This was all on the phone.
15	Ha6	30-39	F	Husband	J.s.s. 3	Yes	3 months	Did ETC members come to check you and the house? What did they do? How was the visit?	Yes, members from the ETC came to check our temperature every morning and also to know if anybody was fallen ill.
16	Hc6	30-39	F	Husband	J.s.s. 1	Yes	20 days		Yes, every morning members from the government came to check our body temperature and to know if anybody fall ill. Another team from an unknown place also came to visit us. They came to encourage us.
17	Ha7	30-39	F	Husband	J.s.s. 3	Yes	3 months	Could you keep in touch with your husband? How? How was that?	Yes, we kept in touch with each other. We communicated through mobile phones mostly twice a day. When he was discharged, he was given another phone.
18	Hc7	30-39	F	Husband	J.s.s. 1	Yes	20 days		Yes, we communicated with each other through mobile phone. This was weekly I didn’t get him at times.
19	Ha8	30-39	F	Husband	J.s.s. 3	Yes	3 months	From what moment did you believe is going to survive?	My husband’s brother visited him and my husband walked to him and they spoke lengthily. He came back and revealed the good news to me and I knew that he was going to survive.
20	Hc8	30-39	F	Husband	J.s.s. 1	Yes	20 days		When my husband called, in a certain point in his treatment, his voice was clearer and he told me that he was started to eat food and able to walk now. That was when I realized that je was going to survive.
21	Ha9	30-39	F	Husband	J.s.s. 3	Yes	3 months	Did you visit your husband? Why? Why not?	I did not visit my husband simply because I was quarantined. I was quarantined from the 10th of December until the 5th of February. When he was discharged from the ETC, he was again admitted at the governmental hospital for the treatment of a cold and other illnesses. That is were I visited him.
22	Hc9	30-39	F	Husband	J.s.s. 1	Yes	20 days		I did not visit my husband because of the long distance and my family was in quarantine.
23	Ha10	30-39	F	Husband	J.s.s. 3	Yes	3 months	How was it to see your husband in the ETC?	He was happy to see that we were not visiting him simply because he don’t want us to be infected with the virus. He knows the risks.
24	Hc10	30-39							He encouraged me to take good care of the family. Somebody told him that two of our son’s died, but later he called and it was all false.
25	Ha11	30-39	F	Husband	J.s.s. 3	Yes	3 months	What impression does the ETC give you?	I was impressed with the ETC and I was convinced that they give very good treatment
26	Hc11	30-39	F	Husband	J.s.s. 1	Yes	20 days		I gave the ETC credit an I believed that they were doing a good job.
27	Ha12	30-39	F	Husband	J.s.s. 3	Yes	3 months	How do you look at the people that have worked there? And about the money they earned?	The people who were working at the center were very good people that were not afraid and are considered as heroes and they were well paid.
28	Hc12	30-39	F	Husband	J.s.s. 1	Yes	20 days		The workers were really sacrificing their lives and they were well paid. They used their money for a good purpose like building houses.
29	Ha13	30-39	F	Husband	J.s.s. 3	Yes	3 months	Would you like having played a role in the treatment? How is it to let other do it?	No, I would not like to play a role in the treatment simply because of the nature of the sickness. If it was not about Ebola, than it would have been another case. I usually thank God and bless all those who were doing that job.
30	Hc13	30-39	F	Husband	J.s.s. 1	Yes	20 days		Yes, I would have loved to play a role in the treatment because I have always been there for him. I don’t like him being away from me in times he is sick. I thank the workers very much for helping my husband go through that disease.
31	Ha14	30-39	F	Husband	J.s.s. 3	Yes	3 months	How did you hear about your husband survived and was going to discharged? How did you feel about that?	My husband’s brother told me that he was going to be discharged. I felt very happy and thanked God for saving his life.
32	Hc14	30-39	F	Husband	J.s.s. 1	Yes	20 days		Sierra Leonean Red Cross society called me to reveal the good news to me through a mobile phone. I then went outside my house and jubilated with my family and I thanked God.
33	Ha16	30-39	F	Husband	J.s.s. 3	Yes	3 months	How was the come back? Was it supported by the ETC?	He was brought home by the workers frim the ERC in a land cruiser van. So yes, the ETC members supported him.
34	Hc16	30-39	F	Husband	J.s.s. 1	Yes	20 days		The Sierra Leonean Red Cross brought him in a van and handed him to us at home.
35	Ha17	30-39	F	Husband	J.s.s. 3	Yes	3 months	Were you afraid at the beginning for your husband? What made you come closer?	No I was not afraid at the beginning because the symptoms have all disappeared and have already been confirmed negative. He looked like a normal person.
36	Hc17	30-39	F	Husband	J.s.s. 1	Yes	20 days		No I was not afraid because the expatriates told me that he was negative. Since it was a white man, I believed him.
37	Ha18	30-39	F	Husband	J.s.s. 3	Yes	3 months	Did your view of the ETC change after hearing all the stories of your husband?	My view about the ETC changed because there is now confidence that you will get well if you do not hide your sickness and you go for early treatment.
38	Hc18	30-39	F	Husband	J.s.s. 1	Yes	20 days		Initially, people were dying at the governmental hospital. But when the ETC was built, we started getting survivors.
